# Supplementary material
Source: Springer Nature journal article supplement (https://www.springermedizin.de/resource/supplementary/13063_2011_668_MOESM1_ESM.pdf/9618466)
Supplement: MOESM1 [file 9618466]

**Data collection**  
**Accept or reject hypothesis**

**Assessment**  
The 2<sup>nd</sup>, 4<sup>th</sup>, 8<sup>th</sup>, 16<sup>th</sup>, 20<sup>th</sup>, 24<sup>th</sup> weeks after  
intervention

**Treatment group**

1. TWP
2. YSJB
3. MTX placebo
4. SSZ placebo

**Control group**

1. MTX
2. SSZ
3. TWP placebo
4. YSJB placebo

Double blind

**Randomization (1:1)**

**RA Patients Enters 10 Clinics-Screening**

**Inclusion criteria:** stage 1 inclusion criteria+ the group of symptoms selected in stage 1 trial

**Stage 1**

**Assessment**

To explore what groups of symptoms based on Chinese medicine theory is correlated with better efficacy (ACR20)

**Tripterygium Wilfordii Polyglycoside Tablet + Yi Shen Juan Bi**

TWP was prescribed at 10 mg, 3 times a day, immediately after meals.

YSJB was prescribed at 8 g, 3 times a day, immediately after meals.

**RA Patients Enters 9 Clinics-Screening**

*Hypothesis: Disease-pattern based (disease-a-group of syndromes) method in trial design of Chinese herbal medicine can improve responses.*

24 weeks

24 weeks
